# Supplementary material
Source: PubMed Central journal article supplement (PMC7572642)
Supplement: NIHMS1626836-supplement-1.pdf [file NIHMS1626836-supplement-1.pdf]

## Supplementary Information for

### **Structural analysis of the regulatory GAF domains of cGMP phosphodiesterase elucidates the allosteric communication pathway**

Richa Gupta, Yong Liu, Huanchen Wang, Christopher T. Nordyke, Ryan Z. Puterbaugh, Weijun Cui, Krisztina Varga, Feixia Chu, Hengming Ke, Harish Vashisth, and Rick H. Cote

Corresponding author: Rick H. Cote

Email: rick.cote@unh.edu

This PDF file includes:

- **Tables S1-S5. Cross-links identified for the four liganded states of cone PDE6C GAFab.**
- **Table S6. Parameters for MD simulations.**
- **Fig. S1. Purification, cGMP binding properties, and characterization of structural asymmetry of chain A and chain B of the x-ray structure.**
- **Fig. S2. Structural alignment of cone PDE6C regulatory domains.**
- **Fig. S3. Comparison of the x-ray structures of the liganded and apo states of the PDE6C GAFa domain.**
- **Fig. S4. RMSD analysis of the chicken cone GAFab x-ray structure versus the cross link-refined apo GAFab structure.**
- **Fig. S5. RMSD plots for various liganded states of GAFab.**
- **Fig. S6. Dynamics and stability of the crystal structure of the PDE6 GAFab homodimer as characterized by various conformational metrics.**
- **Fig. S7. Conformational metrics highlighting dynamics of the apo state of the PDE6 GAFab homodimer.**
- **Fig. S8. Conformational metrics highlighting dynamics of the cGMP-bound state of the PDE6 GAFab homodimer.**
- **Fig. S9. Structural comparison of chicken cone PDE6 GAFab with bovine rod GAFab.**
- **Fig. S10. Solution NMR spectroscopy of cone P $\gamma$ 1-58.**

| Exp. m/z  | z | $\Delta$ | aa1 | aa2 | Cross-linker | Exp. m/z | z | $\Delta$ | aa1 | aa2 | Cross-linker |
|-----------|---|----------|-----|-----|--------------|----------|---|----------|-----|-----|--------------|
| 571.6118  | 3 | 0.57     | 72  | 151 | Sulfo-SDA    | 524.5365 | 4 | 1        | 252 | 263 | Sulfo-SDA    |
| 979.5052  | 2 | 1        | 72  | 82  | Sulfo-SDA    | 652.8502 | 4 | 0.77     | 254 | 263 | Sulfo-SDA    |
| 486.2567  | 4 | -0.71    | 78  | 80  | Sulfo-SDA    | 545.5443 | 4 | 0.33     | 258 | 319 | Sulfo-SDA    |
| 730.3591  | 2 | 0.82     | 78  | 79  | Sulfo-SDA    | 473.2614 | 4 | 0.4      | 259 | 263 | Sulfo-SDA    |
| 687.1058  | 4 | -0.056   | 78  | 122 | BS3          | 644.8098 | 4 | 14       | 263 | 450 | Sulfo-SDA    |
| 515.7557  | 4 | 0.24     | 78  | 412 | BS3          | 516.0494 | 5 | 14       | 263 | 451 | Sulfo-SDA    |
| 486.2567  | 4 | -0.71    | 82  | 83  | Sulfo-SDA    | 516.0497 | 5 | 14       | 263 | 452 | Sulfo-SDA    |
| 794.1235  | 3 | -1.6     | 82  | 122 | BS3          | 601.3285 | 4 | -0.72    | 263 | 446 | Sulfo-SDA    |
| 1018.5402 | 3 | 1.7      | 95  | 171 | Sulfo-SDA    | 439.7320 | 4 | -0.2     | 263 | 439 | Sulfo-SDA    |
| 609.0884  | 4 | 2.9      | 109 | 150 | Sulfo-SDA    | 630.6795 | 3 | 0.33     | 263 | 264 | Sulfo-SDA    |
| 711.3702  | 3 | -2.9     | 122 | 160 | BS3          | 551.5588 | 4 | 5.1      | 263 | 323 | Sulfo-SDA    |
| 625.6874  | 3 | 0.15     | 122 | 159 | BS3          | 660.3913 | 4 | -0.35    | 263 | 396 | BS3          |
| 1045.5590 | 4 | 3.2      | 130 | 132 | Sulfo-SDA    | 610.5917 | 4 | 0.61     | 263 | 319 | BS3          |
| 1024.5414 | 4 | -15      | 130 | 214 | Sulfo-SDA    | 947.9791 | 4 | 1.7      | 283 | 288 | EDC          |
| 983.8519  | 3 | 1.9      | 130 | 132 | Sulfo-SDA    | 710.1106 | 4 | 6.1      | 288 | 305 | BS3          |
| 1019.1956 | 3 | -0.25    | 132 | 171 | BS3          | 693.0577 | 3 | 0.28     | 288 | 395 | BS3          |
| 825.4305  | 4 | 1.6      | 132 | 170 | BS3          | 738.3666 | 4 | 2.6      | 289 | 305 | EDC          |
| 611.3123  | 3 | -0.078   | 132 | 160 | BS3          | 430.2311 | 3 | 0.31     | 304 | 308 | Sulfo-SDA    |
| 752.1084  | 3 | 2.2      | 135 | 406 | Sulfo-SDA    | 644.8417 | 2 | -1.7     | 305 | 306 | Sulfo-SDA    |
| 815.7150  | 7 | 5.9      | 150 | 179 | EDC          | 812.9462 | 2 | 1.2      | 319 | 329 | Sulfo-SDA    |
| 435.9857  | 4 | 0.091    | 151 | 210 | Sulfo-SDA    | 670.0311 | 3 | -0.12    | 319 | 328 | BS3          |
| 533.2853  | 4 | -1.7     | 151 | 168 | Sulfo-SDA    | 707.3931 | 3 | 0.45     | 327 | 332 | Sulfo-SDA    |
| 481.5236  | 4 | 1.4      | 151 | 170 | BS3          | 482.2612 | 3 | 0.57     | 328 | 329 | Sulfo-SDA    |
| 753.1982  | 5 | 0.38     | 151 | 171 | BS3          | 722.8885 | 2 | 1        | 328 | 330 | Sulfo-SDA    |
| 760.4017  | 3 | -1.1     | 151 | 160 | BS3          | 707.3927 | 3 | -0.11    | 328 | 333 | Sulfo-SDA    |
| 599.6542  | 3 | 0.63     | 151 | 214 | BS3          | 591.1158 | 5 | -0.51    | 329 | 409 | Sulfo-SDA    |
| 506.2894  | 4 | -1.2     | 151 | 159 | BS3          | 574.6072 | 3 | 0.77     | 367 | 412 | Sulfo-SDA    |
| 650.0952  | 4 | 3        | 157 | 160 | EDC          | 795.1028 | 3 | 1.3      | 368 | 396 | Sulfo-SDA    |
| 404.7160  | 4 | -1       | 159 | 170 | BS3          | 715.8457 | 2 | 0.21     | 374 | 375 | Sulfo-SDA    |
| 397.2198  | 3 | -1.2     | 159 | 412 | BS3          | 787.0561 | 3 | 1.9      | 374 | 378 | Sulfo-SDA    |
| 514.6675  | 5 | -0.061   | 160 | 163 | Sulfo-SDA    | 836.1483 | 3 | 0.96     | 385 | 386 | Sulfo-SDA    |
| 562.5233  | 4 | -0.091   | 160 | 368 | Sulfo-SDA    | 836.1470 | 3 | -0.59    | 385 | 387 | Sulfo-SDA    |
| 497.0018  | 4 | -1.1     | 160 | 293 | Sulfo-SDA    | 676.6324 | 4 | -0.077   | 392 | 396 | Sulfo-SDA    |
| 778.8913  | 4 | -0.26    | 160 | 171 | BS3          | 901.8438 | 3 | 3.3      | 395 | 396 | Sulfo-SDA    |
| 1165.0922 | 2 | -0.29    | 170 | 171 | Sulfo-SDA    | 868.4985 | 3 | 9.8      | 395 | 398 | EDC          |
| 729.1262  | 4 | 3.2      | 171 | 412 | BS3          | 979.0488 | 4 | 3.8      | 395 | 397 | EDC          |
| 1042.5483 | 3 | 0.27     | 188 | 189 | Sulfo-SDA    | 708.6566 | 4 | 0.6      | 395 | 397 | Sulfo-SDA    |
| 782.1626  | 4 | -0.29    | 188 | 190 | Sulfo-SDA    | 568.6570 | 3 | -0.74    | 395 | 439 | Sulfo-SDA    |
| 721.7288  | 3 | -0.52    | 199 | 200 | Sulfo-SDA    | 567.1266 | 5 | 0.4      | 396 | 398 | Sulfo-SDA    |
| 738.4115  | 3 | -0.76    | 211 | 215 | Sulfo-SDA    | 901.8413 | 3 | 0.51     | 396 | 397 | Sulfo-SDA    |
| 554.0616  | 4 | 1.3      | 212 | 215 | Sulfo-SDA    | 676.6335 | 4 | 1.6      | 396 | 399 | Sulfo-SDA    |
| 1084.5538 | 2 | -2.4     | 249 | 250 | Sulfo-SDA    | 516.0494 | 5 | 1.3      | 446 | 449 | EDC          |

**Table S1. Cross-links identified for the apo state of PDE6C GAFab.**

Crosslinking conditions were followed as described in Fig. 3. Cross-linked peptides were identified following chemical cross-linking of 12  $\mu$ M apo GAFab and analyzed as described in *Materials and Methods*. Exp. m/z is the experimentally measured mass-to-charge ratio, z is the charge state of the peptide, and  $\Delta$  is the accuracy measured in parts per million. The crosslinked peptides are defined by amino acid residue number (aa1, aa2) identified using the indicated crosslinker.

| Exp. m/z        | z        | $\Delta$   | aa1        | aa2        | Cross-linker     | Exp. m/z        | z        | $\Delta$     | aa1        | aa2        | Cross-linker     |
|-----------------|----------|------------|------------|------------|------------------|-----------------|----------|--------------|------------|------------|------------------|
| 486.2574        | 4        | 0.73       | 78         | 80         | Sulfo-SDA        | 610.5907        | 4        | -1           | 263        | 319        | BS3              |
| 730.3591        | 2        | 0.82       | 78         | 79         | Sulfo-SDA        | 552.5042        | 5        | -0.28        | 263        | 328        | BS3              |
| 915.8051        | 3        | -0.28      | 78         | 122        | BS3              | <b>495.0205</b> | <b>4</b> | <b>0.46</b>  | <b>263</b> | <b>412</b> | <b>BS3</b>       |
| 794.1254        | 3        | 0.75       | 82         | 122        | BS3              | 947.9793        | 4        | 1.9          | 283        | 288        | EDC              |
| 1018.5391       | 3        | 0.58       | 95         | 171        | Sulfo-SDA        | 907.1179        | 3        | 2.5          | 286        | 288        | Sulfo-SDA        |
| 674.8717        | 2        | 0.2        | 122        | 123        | Sulfo-SDA        | 430.8685        | 3        | -1.1         | 286        | 287        | Sulfo-SDA        |
| 717.7296        | 3        | 0.29       | 122        | 151        | BS3              | <b>644.0007</b> | <b>3</b> | <b>-0.13</b> | <b>286</b> | <b>319</b> | <b>BS3</b>       |
| <b>975.0190</b> | <b>2</b> | <b>2.1</b> | <b>122</b> | <b>412</b> | <b>BS3</b>       | 710.1086        | 4        | 3.3          | 288        | 305        | BS3              |
| 1075.8926       | 3        | 5.1        | 132        | 133        | Sulfo-SDA        | 738.3680        | 4        | 4.5          | 289        | 308        | EDC              |
| 1045.5614       | 4        | 5.4        | 132        | 138        | Sulfo-SDA        | 430.2317        | 3        | 1.7          | 304        | 308        | Sulfo-SDA        |
| 988.9919        | 2        | -4.4       | 132        | 134        | Sulfo-SDA        | 644.8426        | 2        | -0.33        | 305        | 306        | Sulfo-SDA        |
| 988.9966        | 2        | 0.39       | 132        | 135        | Sulfo-SDA        | 672.8561        | 2        | 0.27         | 305        | 308        | BS3              |
| 1024.5280       | 3        | 0.49       | 132        | 171        | BS3              | <b>605.6481</b> | <b>3</b> | <b>0.79</b>  | <b>308</b> | <b>311</b> | <b>Sulfo-SDA</b> |
| 611.3127        | 3        | 0.58       | 132        | 160        | BS3              | 605.6487        | 3        | 1.8          | 308        | 309        | Sulfo-SDA        |
| 488.7177        | 4        | -4.1       | 151        | 170        | Sulfo-SDA        | 605.3184        | 3        | 0.11         | 319        | 441        | BS3              |
| 570.5550        | 4        | 2.2        | 151        | 160        | BS3              | 670.0314        | 3        | 0.33         | 319        | 328        | BS3              |
| 779.6612        | 4        | 0.75       | 151        | 171        | BS3              | 618.6730        | 3        | -0.17        | 319        | 409        | BS3              |
| 898.9781        | 2        | 1.1        | 151        | 214        | BS3              | 835.9720        | 2        | 0.22         | 328        | 329        | Sulfo-SDA        |
| 650.0953        | 4        | 3.2        | 157        | 160        | EDC              | 1060.5872       | 2        | 1.6          | 328        | 330        | Sulfo-SDA        |
| 728.1359        | 4        | 4.6        | 159        | 180        | BS3              | 707.3930        | 3        | 0.31         | 328        | 333        | Sulfo-SDA        |
| <b>680.8263</b> | <b>4</b> | <b>-14</b> | <b>169</b> | <b>308</b> | <b>Sulfo-SDA</b> | 596.5784        | 4        | 0.42         | 367        | 396        | Sulfo-SDA        |
| 1157.0958       | 2        | 0.62       | 170        | 171        | Sulfo-SDA        | 574.6066        | 3        | -0.28        | 367        | 412        | Sulfo-SDA        |
| 1047.8823       | 3        | 2.5        | 188        | 189        | Sulfo-SDA        | 596.5776        | 4        | -0.92        | 368        | 396        | Sulfo-SDA        |
| 723.3744        | 3        | 1.4        | 249        | 250        | Sulfo-SDA        | 715.8458        | 2        | 0.35         | 374        | 375        | Sulfo-SDA        |
| 524.5358        | 4        | -0.42      | 255        | 263        | Sulfo-SDA        | 787.0552        | 3        | 0.76         | 374        | 378        | Sulfo-SDA        |
| 492.5123        | 4        | 2.1        | 258        | 319        | Sulfo-SDA        | <b>720.3610</b> | <b>3</b> | <b>-0.51</b> | <b>374</b> | <b>409</b> | <b>BS3</b>       |
| 648.6508        | 3        | -0.35      | 258        | 374        | Sulfo-SDA        | 707.0067        | 3        | 0.15         | 374        | 441        | BS3              |
| 473.2616        | 4        | 0.82       | 259        | 263        | Sulfo-SDA        | 1063.0977       | 2        | -1           | 385        | 386        | Sulfo-SDA        |
| 644.8104        | 4        | 15         | 263        | 450        | Sulfo-SDA        | 901.8419        | 3        | 1.2          | 395        | 396        | Sulfo-SDA        |
| 516.0493        | 5        | 14         | 263        | 452        | Sulfo-SDA        | 911.1931        | 3        | 5.2          | 395        | 398        | EDC              |
| 516.0497        | 5        | 14         | 263        | 451        | Sulfo-SDA        | 901.8418        | 3        | 1.1          | 395        | 396        | Sulfo-SDA        |
| 630.6798        | 3        | 0.87       | 263        | 264        | Sulfo-SDA        | 708.6564        | 4        | 0.29         | 396        | 400        | Sulfo-SDA        |
| 880.1890        | 3        | 3.1        | 263        | 396        | BS3              | 632.3226        | 2        | 1.4          | 444        | 445        | Sulfo-SDA        |
| 517.0281        | 4        | 0.32       | 263        | 441        | BS3              | 516.0505        | 5        | 3.4          | 446        | 449        | EDC              |
| 527.0438        | 4        | -0.4       | 263        | 409        | BS3              |                 |          |              |            |            |                  |

**Table S2. Cross-links identified for the cGMP-liganded state of PDE6C GAFab (GAFab-cGMP).**

Crosslinking conditions were followed as described in Fig. 3 Cross-linked peptides were identified following chemical cross-linking of 12  $\mu$ M GAFab pre-incubated with 10-fold molar excess cGMP and analyzed as described in *Materials and Methods*. Crosslinks found only in the cGMP liganded state are shown in bold. Abbreviations are defined in the legend to Table S1.

| Exp. m/z  | z | $\Delta$ | pep1  | aa1 | pep2  | aa2 | Cross-linker | Exp. m/z  | z | $\Delta$ | pep1  | aa1 | pep2  | aa2 | Cross-linker |
|-----------|---|----------|-------|-----|-------|-----|--------------|-----------|---|----------|-------|-----|-------|-----|--------------|
| 929.4758  | 2 | -2.4     | GAFab | 72  | GAFab | 82  | EDC          | 756.3618  | 2 | -0.13    | GAFab | 288 | GAFab | 292 | EDC          |
| 687.1057  | 4 | -0.2     | GAFab | 78  | GAFab | 122 | BS3          | 695.0173  | 3 | -0.43    | GAFab | 289 | GAFab | 308 | EDC          |
| 730.3585  | 2 | 0.0019   | GAFab | 78  | GAFab | 79  | Sulfo-SDA    | 641.0309  | 3 | -0.61    | GAFab | 289 | GAFab | 395 | EDC          |
| 547.8380  | 2 | 0.61     | GAFab | 82  | GAFab | 83  | Sulfo-SDA    | 506.0449  | 4 | 1.8      | GAFab | 292 | GAFab | 395 | EDC          |
| 674.8718  | 2 | 0.34     | GAFab | 122 | GAFab | 123 | Sulfo-SDA    | 546.5328  | 4 | -1.7     | GAFab | 293 | GAFab | 308 | EDC          |
| 760.0797  | 3 | 1.3      | GAFab | 122 | GAFab | 135 | Sulfo-SDA    | 430.2307  | 3 | -0.62    | GAFab | 304 | GAFab | 308 | Sulfo-SDA    |
| 811.4542  | 3 | 0.47     | GAFab | 122 | GAFab | 189 | EDC          | 644.8423  | 2 | -0.79    | GAFab | 305 | GAFab | 306 | Sulfo-SDA    |
| 769.7230  | 3 | 0.046    | GAFab | 122 | GAFab | 367 | EDC          | 743.8929  | 2 | -0.18    | GAFab | 305 | GAFab | 308 | Sulfo-SDA    |
| 726.3870  | 3 | -1.1     | GAFab | 122 | GAFab | 378 | EDC          | 605.6467  | 3 | -1.5     | GAFab | 308 | GAFab | 311 | Sulfo-SDA    |
| 1045.5575 | 4 | 1.7      | GAFab | 130 | GAFab | 132 | Sulfo-SDA    | 723.0406  | 3 | 0.12     | GAFab | 308 | GAFab | 314 | EDC          |
| 1024.5275 | 3 | 0.0031   | GAFab | 132 | GAFab | 171 | BS3          | 704.3428  | 3 | 0.86     | GAFab | 314 | GAFab | 396 | EDC          |
| 611.3097  | 3 | -4.3     | GAFab | 132 | GAFab | 160 | BS3          | 605.3181  | 3 | -0.39    | GAFab | 319 | GAFab | 441 | BS3          |
| 988.9966  | 2 | 0.39     | GAFab | 132 | GAFab | 134 | Sulfo-SDA    | 707.3939  | 3 | 1.6      | GAFab | 327 | GAFab | 332 | Sulfo-SDA    |
| 988.9964  | 2 | 0.19     | GAFab | 132 | GAFab | 135 | Sulfo-SDA    | 482.2609  | 3 | -0.052   | GAFab | 328 | GAFab | 329 | Sulfo-SDA    |
| 752.1006  | 3 | -8.2     | GAFab | 132 | GAFab | 386 | Sulfo-SDA    | 707.3934  | 3 | 0.88     | GAFab | 328 | GAFab | 330 | Sulfo-SDA    |
| 745.1490  | 4 | -1.3     | GAFab | 132 | GAFab | 133 | EDC          | 707.3923  | 3 | -0.68    | GAFab | 328 | GAFab | 333 | Sulfo-SDA    |
| 699.0277  | 3 | -1.6     | GAFab | 150 | GAFab | 170 | Sulfo-SDA    | 579.6833  | 3 | -1.6     | GAFab | 328 | GAFab | 378 | EDC          |
| 464.6031  | 3 | 1        | GAFab | 151 | GAFab | 169 | BS3          | 839.4587  | 4 | 0.99     | GAFab | 328 | GAFab | 330 | EDC          |
| 599.6564  | 3 | 4.3      | GAFab | 151 | GAFab | 214 | BS3          | 571.5649  | 4 | -0.25    | GAFab | 367 | GAFab | 396 | EDC          |
| 646.8674  | 2 | 2        | GAFab | 151 | GAFab | 170 | BS3          | 715.8451  | 2 | -0.63    | GAFab | 374 | GAFab | 375 | Sulfo-SDA    |
| 593.5720  | 4 | 0.23     | GAFab | 151 | GAFab | 209 | Sulfo-SDA    | 753.7033  | 3 | -0.65    | GAFab | 374 | GAFab | 378 | EDC          |
| 902.1306  | 3 | 1.8      | GAFab | 156 | GAFab | 171 | Sulfo-SDA    | 539.0643  | 4 | 1.2      | GAFab | 379 | GAFab | 396 | EDC          |
| 866.4572  | 3 | 2.3      | GAFab | 157 | GAFab | 160 | EDC          | 751.7680  | 3 | 1.8      | GAFab | 385 | GAFab | 386 | Sulfo-SDA    |
| 1047.8821 | 3 | 2.3      | GAFab | 188 | GAFab | 189 | Sulfo-SDA    | 901.8422  | 3 | 1.5      | GAFab | 395 | GAFab | 396 | Sulfo-SDA    |
| 786.1621  | 4 | 0.69     | GAFab | 188 | GAFab | 190 | Sulfo-SDA    | 868.4924  | 3 | 2.7      | GAFab | 395 | GAFab | 397 | EDC          |
| 727.0612  | 3 | 0.53     | GAFab | 199 | GAFab | 200 | Sulfo-SDA    | 868.4937  | 3 | 4.2      | GAFab | 395 | GAFab | 398 | EDC          |
| 705.0622  | 3 | 1.3      | GAFab | 210 | GAFab | 215 | EDC          | 722.6653  | 4 | 3.5      | GAFab | 395 | GAFab | 396 | BS3          |
| 738.4125  | 3 | 0.59     | GAFab | 211 | GAFab | 215 | Sulfo-SDA    | 568.6575  | 3 | 0.078    | GAFab | 395 | GAFab | 439 | Sulfo-SDA    |
| 1006.5064 | 2 | 0.51     | GAFab | 249 | GAFab | 250 | Sulfo-SDA    | 92.6113   | 3 | 1.3      | GAFab | 395 | GAFab | 398 | EDC          |
| 872.4642  | 2 | 0.43     | GAFab | 253 | GAFab | 319 | EDC          | 579.6833  | 3 | -1.6     | GAFab | 395 | GAFab | 446 | EDC          |
| 681.7285  | 3 | -1.3     | GAFab | 255 | GAFab | 395 | Sulfo-SDA    | 708.6545  | 4 | -2.4     | GAFab | 396 | GAFab | 408 | Sulfo-SDA    |
| 819.9417  | 2 | 1.4      | GAFab | 256 | GAFab | 319 | Sulfo-SDA    | 504.0407  | 4 | -0.15    | GAFab | 396 | GAFab | 441 | BS3          |
| 580.0117  | 3 | -0.92    | GAFab | 258 | GAFab | 395 | EDC          | 901.8417  | 3 | 0.95     | GAFab | 396 | GAFab | 397 | Sulfo-SDA    |
| 597.3286  | 3 | 0.26     | GAFab | 258 | GAFab | 263 | EDC          | 708.6566  | 4 | 0.58     | GAFab | 396 | GAFab | 400 | Sulfo-SDA    |
| 870.1294  | 3 | -1.3     | GAFab | 263 | GAFab | 264 | Sulfo-SDA    | 1092.6118 | 3 | 1.8      | GAFab | 396 | GAFab | 397 | EDC          |
| 516.0483  | 5 | 12       | GAFab | 263 | GAFab | 452 | Sulfo-SDA    | 683.6432  | 4 | 0.17     | GAFab | 396 | GAFab | 398 | EDC          |
| 517.0277  | 4 | -0.45    | GAFab | 263 | GAFab | 441 | BS3          | 819.7094  | 4 | 0.22     | GAFab | 409 | GAFab | 410 | EDC          |
| 947.9800  | 4 | 2.7      | GAFab | 283 | GAFab | 288 | EDC          | 427.9638  | 4 | -1.3     | GAFab | 441 | GAFab | 444 | BS3          |
| 758.5859  | 5 | 3.3      | GAFab | 286 | GAFab | 289 | EDC          | 632.3215  | 2 | -0.35    | GAFab | 441 | GAFab | 446 | Sulfo-SDA    |
| 993.9608  | 2 | -0.52    | GAFab | 286 | GAFab | 314 | EDC          | 632.3214  | 2 | -0.51    | GAFab | 444 | GAFab | 445 | Sulfo-SDA    |
| 641.0312  | 3 | -0.15    | GAFab | 287 | GAFab | 395 | EDC          | 516.0495  | 5 | 1.5      | GAFab | 446 | GAFab | 449 | EDC          |
| 481.0256  | 4 | 0.65     | GAFab | 287 | GAFab | 396 | EDC          |           |   |          |       |     |       |     |              |

**Table S3. Cross-links identified for the Py-liganded state of PDE6C GAFab (Py-GAFab).** Crosslinking conditions were followed as described in Fig. 3. Cross-linked peptides were identified following chemical cross-linking of 12  $\mu$ M GAFab pre-incubated with 120  $\mu$ M Py1-58 (or a mutant Py1-58; see *Materials and Methods*) and analyzed as described previously. Abbreviations are defined in the legend to Table S1.

| Exp. m/z  | z | $\Delta$ | pep1  | aa1 | pep2  | aa2 | Cross-linker | Exp. m/z  | z | $\Delta$ | pep1  | aa1 | pep2  | aa2 | Cross-linker |
|-----------|---|----------|-------|-----|-------|-----|--------------|-----------|---|----------|-------|-----|-------|-----|--------------|
| 929.4771  | 2 | -0.97    | GAFab | 72  | GAFab | 82  | EDC          | 993.9622  | 2 | 0.89     | GAFab | 288 | GAFab | 314 | EDC          |
| 687.1059  | 4 | 0.09     | GAFab | 78  | GAFab | 122 | BS3          | 738.3687  | 4 | 5.4      | GAFab | 289 | GAFab | 305 | EDC          |
| 730.3586  | 2 | 0.14     | GAFab | 78  | GAFab | 79  | Sulfo-SDA    | 695.0166  | 3 | -1.4     | GAFab | 289 | GAFab | 308 | EDC          |
| 595.8455  | 4 | 0.13     | GAFab | 82  | GAFab | 122 | BS3          | 906.4911  | 3 | -2.7     | GAFab | 289 | GAFab | 396 | EDC          |
| 547.8376  | 2 | -0.12    | GAFab | 82  | GAFab | 83  | Sulfo-SDA    | 506.0467  | 4 | 5.3      | GAFab | 292 | GAFab | 396 | EDC          |
| 1018.5392 | 3 | 0.68     | GAFab | 95  | GAFab | 171 | Sulfo-SDA    | 607.9922  | 3 | 4.7      | GAFab | 292 | GAFab | 319 | EDC          |
| 766.4034  | 3 | -1.5     | GAFab | 103 | GAFab | 171 | Sulfo-SDA    | 1011.0821 | 2 | 1.3      | GAFab | 293 | GAFab | 396 | EDC          |
| 674.8718  | 2 | 0.34     | GAFab | 122 | GAFab | 123 | Sulfo-SDA    | 11.0825   | 2 | 1.7      | GAFab | 293 | GAFab | 395 | EDC          |
| 977.5193  | 3 | 1.2      | GAFab | 122 | GAFab | 126 | Sulfo-SDA    | 644.8433  | 2 | 0.76     | GAFab | 305 | GAFab | 306 | Sulfo-SDA    |
| 811.4540  | 3 | 0.22     | GAFab | 122 | GAFab | 189 | EDC          | 743.8934  | 2 | 0.5      | GAFab | 305 | GAFab | 308 | Sulfo-SDA    |
| 944.1684  | 3 | 1.2      | GAFab | 122 | GAFab | 124 | EDC          | 542.5328  | 4 | 1.1      | GAFab | 308 | GAFab | 314 | EDC          |
| 988.9973  | 2 | 1.1      | GAFab | 130 | GAFab | 132 | Sulfo-SDA    | 793.4263  | 3 | 5.9      | GAFab | 311 | GAFab | 319 | EDC          |
| 1024.5278 | 3 | 0.3      | GAFab | 132 | GAFab | 171 | BS3          | 1056.0089 | 2 | -0.72    | GAFab | 314 | GAFab | 374 | EDC          |
| 973.8683  | 3 | 1.3      | GAFab | 132 | GAFab | 216 | Sulfo-SDA    | 695.0345  | 3 | -0.14    | GAFab | 319 | GAFab | 444 | BS3          |
| 988.9967  | 2 | 0.49     | GAFab | 132 | GAFab | 134 | Sulfo-SDA    | 605.3187  | 3 | 0.61     | GAFab | 319 | GAFab | 441 | BS3          |
| 988.9957  | 2 | -0.52    | GAFab | 132 | GAFab | 133 | Sulfo-SDA    | 707.3931  | 3 | 0.45     | GAFab | 327 | GAFab | 332 | Sulfo-SDA    |
| 659.6673  | 3 | 1.1      | GAFab | 132 | GAFab | 135 | Sulfo-SDA    | 722.8879  | 2 | 0.21     | GAFab | 328 | GAFab | 329 | Sulfo-SDA    |
| 944.1678  | 3 | 0.55     | GAFab | 132 | GAFab | 133 | EDC          | 361.9468  | 4 | -2       | GAFab | 328 | GAFab | 330 | Sulfo-SDA    |
| 713.8801  | 8 | 11       | GAFab | 150 | GAFab | 179 | EDC          | 1060.5868 | 2 | 1.2      | GAFab | 328 | GAFab | 333 | Sulfo-SDA    |
| 464.6026  | 3 | -0.048   | GAFab | 151 | GAFab | 159 | BS3          | 839.4573  | 4 | -0.68    | GAFab | 328 | GAFab | 330 | EDC          |
| 599.6541  | 3 | 0.46     | GAFab | 151 | GAFab | 214 | BS3          | 758.3984  | 3 | -0.25    | GAFab | 328 | GAFab | 378 | EDC          |
| 650.0968  | 4 | 5.5      | GAFab | 157 | GAFab | 160 | EDC          | 574.6073  | 3 | 0.94     | GAFab | 367 | GAFab | 412 | Sulfo-SDA    |
| 514.6675  | 5 | -0.061   | GAFab | 160 | GAFab | 163 | Sulfo-SDA    | 571.5655  | 4 | 0.8      | GAFab | 367 | GAFab | 396 | EDC          |
| 363.8491  | 3 | 0.37     | GAFab | 161 | GAFab | 170 | Sulfo-SDA    | 787.0540  | 3 | -0.77    | GAFab | 374 | GAFab | 378 | Sulfo-SDA    |
| 821.0855  | 3 | 2.7      | GAFab | 168 | GAFab | 171 | Sulfo-SDA    | 787.0552  | 3 | 0.76     | GAFab | 374 | GAFab | 379 | Sulfo-SDA    |
| 797.6451  | 4 | 1.1      | GAFab | 169 | GAFab | 171 | EDC          | 715.8455  | 2 | -0.07    | GAFab | 374 | GAFab | 375 | Sulfo-SDA    |
| 859.7726  | 3 | -6.3     | GAFab | 171 | GAFab | 312 | Sulfo-SDA    | 751.7666  | 3 | -0.022   | GAFab | 385 | GAFab | 386 | Sulfo-SDA    |
| 1047.8806 | 3 | 0.9      | GAFab | 188 | GAFab | 189 | Sulfo-SDA    | 901.8412  | 3 | 0.4      | GAFab | 385 | GAFab | 387 | Sulfo-SDA    |
| 582.9872  | 3 | 0.67     | GAFab | 189 | GAFab | 412 | EDC          | 676.6326  | 4 | 0.22     | GAFab | 393 | GAFab | 396 | Sulfo-SDA    |
| 705.0626  | 3 | 1.9      | GAFab | 210 | GAFab | 215 | EDC          | 901.8425  | 3 | 1.8      | GAFab | 395 | GAFab | 396 | Sulfo-SDA    |
| 1084.5569 | 2 | 0.42     | GAFab | 249 | GAFab | 250 | Sulfo-SDA    | 568.6575  | 3 | 0.078    | GAFab | 395 | GAFab | 439 | Sulfo-SDA    |
| 1006.5064 | 2 | 0.51     | GAFab | 249 | GAFab | 251 | Sulfo-SDA    | 577.9899  | 3 | 1.4      | GAFab | 395 | GAFab | 415 | Sulfo-SDA    |
| 681.7287  | 3 | -1       | GAFab | 255 | GAFab | 395 | Sulfo-SDA    | 868.4938  | 3 | 4.3      | GAFab | 395 | GAFab | 397 | EDC          |
| 648.6512  | 3 | 0.26     | GAFab | 257 | GAFab | 374 | Sulfo-SDA    | 579.6843  | 3 | 0.13     | GAFab | 395 | GAFab | 446 | EDC          |
| 819.9401  | 2 | -0.5     | GAFab | 258 | GAFab | 319 | Sulfo-SDA    | 546.8093  | 6 | 1.3      | GAFab | 395 | GAFab | 397 | EDC          |
| 413.8239  | 5 | 0.24     | GAFab | 263 | GAFab | 441 | BS3          | 579.2989  | 4 | -0.43    | GAFab | 396 | GAFab | 441 | BS3          |
| 813.7858  | 3 | -0.26    | GAFab | 263 | GAFab | 319 | BS3          | 708.6578  | 4 | 2.3      | GAFab | 396 | GAFab | 397 | Sulfo-SDA    |
| 528.5142  | 5 | -0.91    | GAFab | 263 | GAFab | 396 | BS3          | 622.3821  | 3 | -0.72    | GAFab | 396 | GAFab | 446 | EDC          |
| 630.6799  | 3 | 1        | GAFab | 263 | GAFab | 264 | Sulfo-SDA    | 819.7103  | 4 | 1.3      | GAFab | 409 | GAFab | 410 | EDC          |
| 947.9810  | 4 | 3.7      | GAFab | 283 | GAFab | 288 | EDC          | 632.3220  | 2 | 0.44     | GAFab | 441 | GAFab | 445 | Sulfo-SDA    |
| 653.7973  | 2 | 0.14     | GAFab | 286 | GAFab | 288 | Sulfo-SDA    | 601.9882  | 3 | 0.36     | GAFab | 441 | GAFab | 446 | EDC          |
| 993.9615  | 2 | 0.18     | GAFab | 286 | GAFab | 314 | EDC          | 516.0496  | 5 | 1.7      | GAFab | 446 | GAFab | 449 | EDC          |
| 481.0217  | 4 | -7.5     | GAFab | 287 | GAFab | 396 | EDC          | 519.2462  | 5 | -2.9     | GAFab | 446 | GAFab | 449 | EDC          |

**Table S4. Cross-links identified for the Py- and cGMP-liganded state of PDE6C GAFab (Py-GAFab-cGMP).**

Crosslinking conditions were followed as described in Fig. 3. Cross-linked peptides were identified following chemical cross-linking of 12  $\mu$ M GAFab pre-incubated with 120  $\mu$ M Py1-58 (or a mutant Py1-58; see *Materials and Methods*) and a 10-fold molar excess of cGMP. Abbreviations are defined in the legend to Table S1.

| Exp. m/z | z | $\Delta$ | pep1   | aa1 | pep2  | aa2 | Cross-linker | Condition  |
|----------|---|----------|--------|-----|-------|-----|--------------|------------|
| 802.9176 | 4 | 0.038    | Py*    | 11  | GAFab | 131 | EDC          | + cGMP     |
| 564.6147 | 3 | 1.2      | Py*    | 11  | GAFab | 367 | EDC          | $\pm$ cGMP |
| 562.7966 | 2 | 2.3      | Py*    | 11  | GAFab | 167 | Sulfo-SDA    | + cGMP     |
| 883.1242 | 3 | 3        | Py*    | 11  | GAFab | 132 | BS3          | $\pm$ cGMP |
| 750.6417 | 4 | 0.73     | Py*    | 11  | GAFab | 171 | BS3          | $\pm$ cGMP |
| 759.8852 | 4 | 2        | Py*    | 13  | GAFab | 171 | EDC          | + cGMP     |
| 732.6146 | 4 | -1.9     | Py*    | 13  | GAFab | 132 | EDC          | $\pm$ cGMP |
| 794.3838 | 3 | -1.7     | Py*    | 13  | GAFab | 374 | EDC          | + cGMP     |
| 538.6030 | 3 | 1.6      | Py*    | 13  | GAFab | 412 | EDC          | $\pm$ cGMP |
| 767.0710 | 3 | 2.4      | Py*    | 13  | GAFab | 122 | EDC          | - cGMP     |
| 436.2436 | 3 | 0.65     | Py*    | 23  | GAFab | 314 | EDC          | + cGMP     |
| 424.7423 | 4 | 2.7      | Py     | 23  | GAFab | 300 | EDC          | + cGMP     |
| 528.9405 | 3 | 0.81     | Py*    | 23  | GAFab | 368 | EDC          | $\pm$ cGMP |
| 421.9698 | 4 | -0.43    | Py/Py* | 23  | GAFab | 368 | Sulfo-SDA    | $\pm$ cGMP |
| 563.6599 | 3 | 1.8      | Py/Py* | 23  | GAFab | 319 | BS3          | $\pm$ cGMP |
| 511.7688 | 4 | 1.7      | Py     | 23  | GAFab | 170 | BS3          | + cGMP     |
| 463.7629 | 4 | 4.5      | Py     | 23  | GAFab | 305 | BS3          | $\pm$ cGMP |
| 663.1042 | 4 | -1.5     | Py/Py* | 23  | GAFab | 171 | BS3          | - cGMP     |
| 665.3478 | 3 | 0.95     | Py/Py* | 23  | GAFab | 374 | BS3          | - cGMP     |
| 396.9566 | 4 | -0.69    | Py*    | 23  | GAFab | 367 | EDC          | - cGMP     |
| 562.2911 | 3 | 0.38     | Py/Py* | 23  | GAFab | 369 | Sulfo-SDA    | - cGMP     |
| 437.7418 | 4 | -2.1     | Py*    | 29  | GAFab | 300 | EDC          | + cGMP     |
| 876.1541 | 3 | 14       | Py     | 29  | GAFab | 396 | BS3          | + cGMP     |
| 546.2759 | 3 | 0.81     | Py*    | 29  | GAFab | 368 | EDC          | + cGMP     |
| 682.6824 | 3 | -0.22    | Py/Py* | 29  | GAFab | 374 | BS3          | - cGMP     |
| 676.1063 | 4 | -0.67    | Py/Py* | 29  | GAFab | 171 | BS3          | - cGMP     |
| 494.2818 | 3 | -0.17    | Py/Py* | 29  | GAFab | 151 | BS3          | - cGMP     |
| 752.9006 | 4 | 0.14     | Py*    | 37  | GAFab | 249 | BS3          | + cGMP     |
| 581.1049 | 4 | 0.97     | Py/Py* | 37  | GAFab | 396 | BS3          | + cGMP     |
| 617.3434 | 4 | 0.57     | Py*    | 37  | GAFab | 398 | EDC          | - cGMP     |
| 494.0759 | 5 | 0.016    | Py*    | 37  | GAFab | 397 | EDC          | - cGMP     |
| 480.2988 | 4 | -0.099   | Py/Py* | 39  | GAFab | 396 | BS3          | + cGMP     |
| 869.1240 | 3 | -0.29    | Py/Py* | 39  | GAFab | 249 | BS3          | + cGMP     |
| 573.6627 | 3 | 0.47     | Py/Py* | 39  | GAFab | 319 | BS3          | $\pm$ cGMP |
| 493.2857 | 4 | -0.62    | Py*    | 39  | GAFab | 263 | BS3          | - cGMP     |
| 378.9750 | 4 | -0.18    | Py/Py* | 42  | GAFab | 409 | BS3          | $\pm$ cGMP |
| 616.3616 | 3 | 1.4      | Py*    | 42  | GAFab | 319 | BS3          | + cGMP     |
| 428.5677 | 3 | 0.29     | Py     | 43  | GAFab | 288 | BS3          | + cGMP     |
| 377.8853 | 3 | 0.45     | Py*    | 43  | GAFab | 412 | BS3          | + cGMP     |
| 449.0372 | 4 | 0.61     | Py/Py* | 43  | GAFab | 396 | BS3          | $\pm$ cGMP |
| 827.4419 | 3 | 0.25     | Py*    | 43  | GAFab | 249 | BS3          | + cGMP     |
| 420.5837 | 3 | 0.59     | Py/Py* | 43  | GAFab | 409 | BS3          | $\pm$ cGMP |
| 797.4665 | 2 | 0.42     | Py/Py* | 43  | GAFab | 319 | BS3          | $\pm$ cGMP |
| 499.6087 | 3 | 0.53     | Py*    | 46  | GAFab | 264 | Sulfo-SDA    | + cGMP     |
| 619.0176 | 3 | 1        | Py/Py* | 46  | GAFab | 319 | BS3          | $\pm$ cGMP |
| 475.7602 | 4 | -2.1     | Py     | 49  | GAFab | 263 | Sulfo-SDA    | $\pm$ cGMP |
| 739.0413 | 3 | -0.17    | Py*    | 51  | GAFab | 396 | EDC          | - cGMP     |

**Table S5. Inter-molecular cross-links identified for the Py $\gamma$ -liganded state of PDE6C GAFab in the presence or absence of cGMP.**

Crosslinking conditions were followed as described in Fig. 3. Inter-molecular cross-linked peptides were identified following chemical cross-linking of 12  $\mu$ M GAFab (in the presence or absence of cGMP) pre-incubated with 120  $\mu$ M Py1-58 or a mutant Py1-58 containing two lysine substitutions: Thr7Lys and Thr11Lys (denoted in table with \*). Cross-links identified in the absence (- cGMP), presence (+ cGMP), or in both conditions ( $\pm$  cGMP) are indicated. Samples were prepared and analyzed as described in *Materials and Methods*. Abbreviations are defined in the legend to Table S1.

**Table S6. Parameters for MD simulations**

| #          | Atoms  | Water | Length | Runs | Box size             |
|------------|--------|-------|--------|------|----------------------|
| X-ray      | 113990 | 33856 | 500 ns | 3    | 87 Å × 131 Å × 107 Å |
| apo state  | 104728 | 30533 | 360 ns | 3    | 88 Å × 120 Å × 107 Å |
| cGMP bound | 104792 | 30531 | 360 ns | 3    | 88 Å × 120 Å × 107 Å |

Details of MD simulations on three different systems are highlighted including the numbers of total and water atoms in each simulation, the length of each trajectory (3 independent simulations for each system) and the dimensions of each simulation domain.

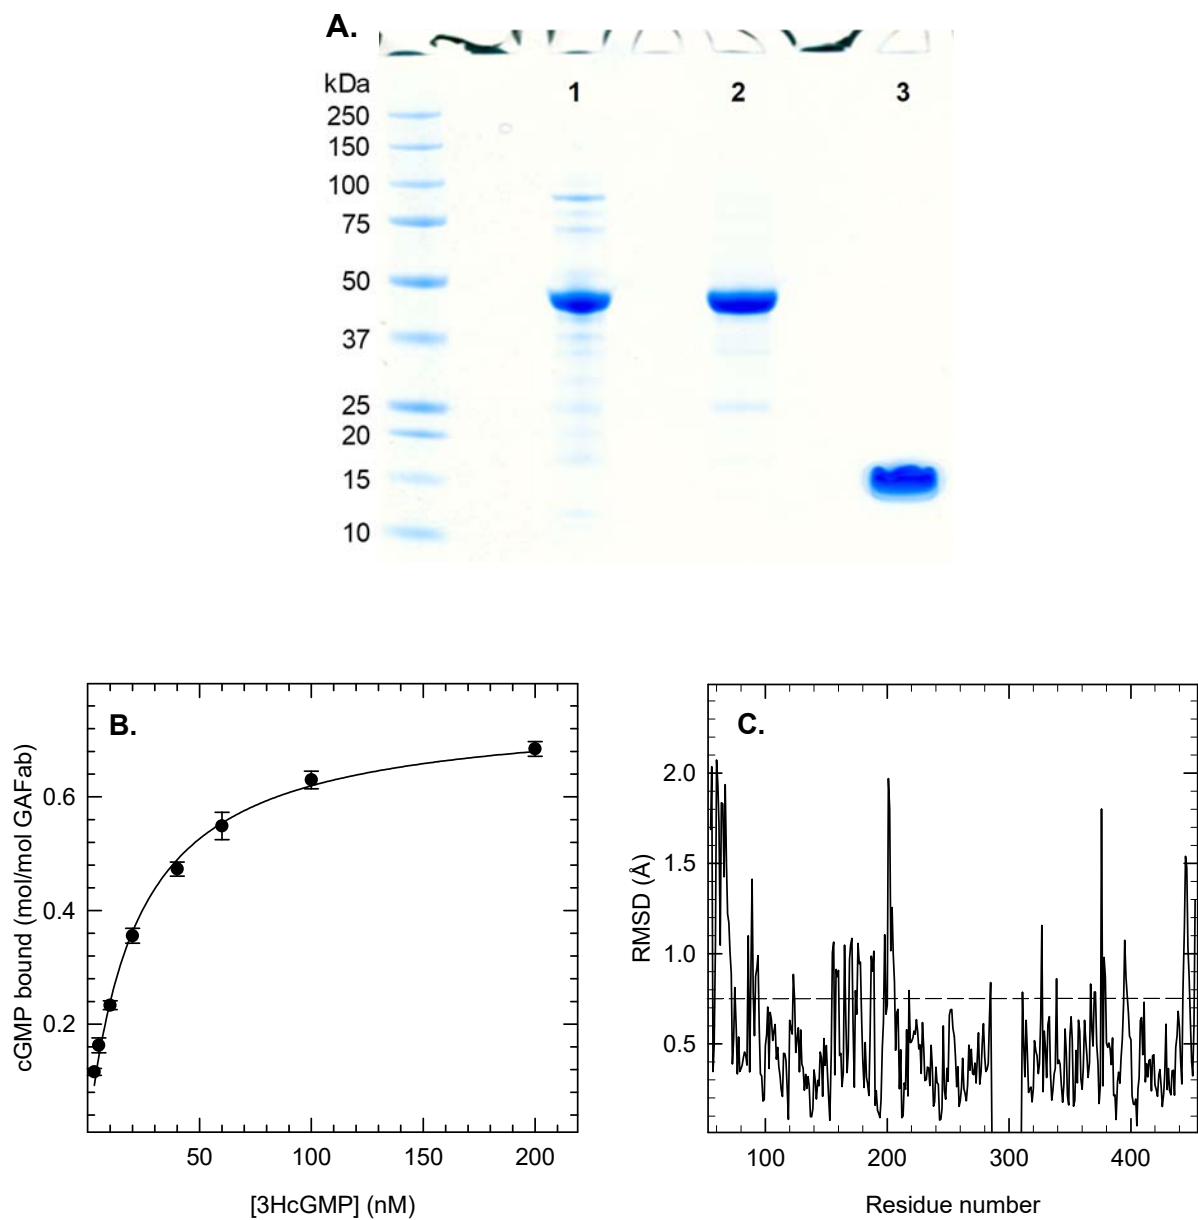

**Fig S1. Purification, cGMP binding properties, and characterization of structural asymmetry of chain A and chain B of the x-ray structure.** **A.** SDS-PAGE of purified, recombinant chicken cone PDE6 GAFab (PDE6C, residues 42-458) and chicken cone P $\gamma$ 1-58. Lane 1, affinity-purified GAFab; Lane 2, gel filtration-purified GAFab; Lane 3, HPLC-purified P $\gamma$ 1-58. **B.** Binding curve of 1.5 nM GAFab incubated with increasing concentrations of [ $^3$ H]cGMP; the *solid line* represents fitting the data to a hyperbolic curve, with a  $K_D = 22 \pm 2.2$  nM ( $n=3$ ). **C.** RMSD analysis of chain A versus chain B of the chicken cone PDE6 GAFab x-ray structure was calculated using VMD; average RMSD value was 0.74 Å (*dotted line*).



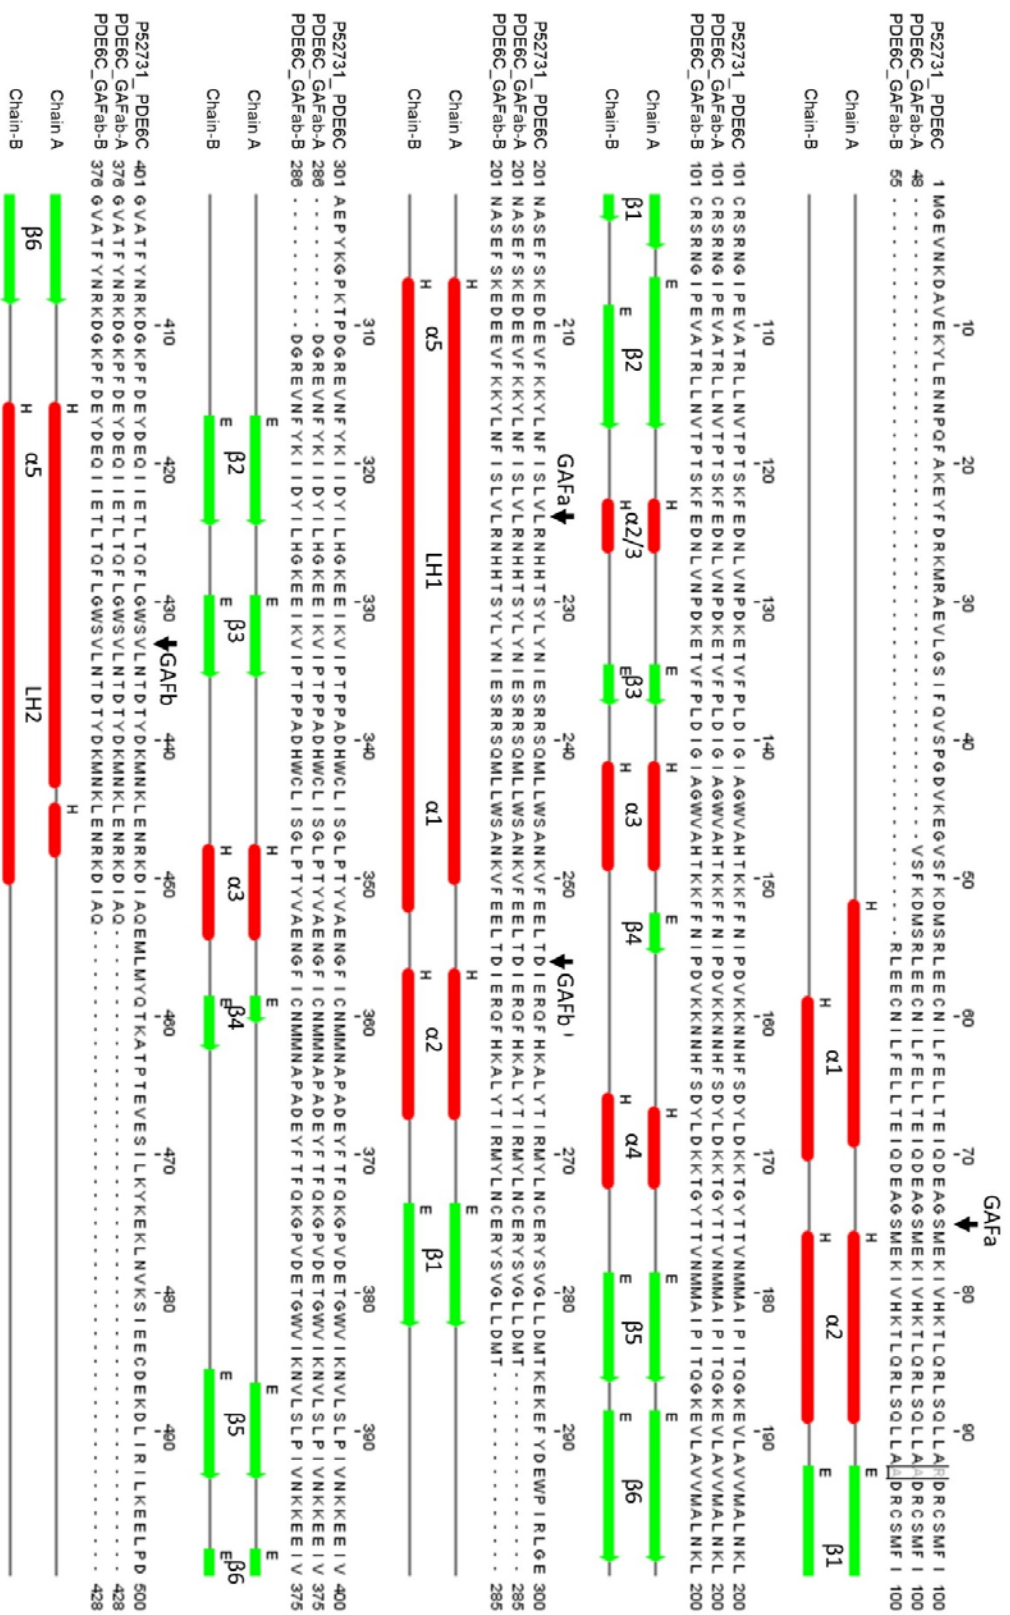

**Fig. S2. Structural alignment of cone PDE6C regulatory domains.** The chicken cone PDE6 amino acid sequence (PDE6C\_CHICK, P52731) was aligned with the two subunits of the crystal structure (Fig. 2A) with secondary structure elements highlighted in red ( $\alpha$ -helix) or green ( $\beta$ -strand). The boundaries for the GAFa (residues 75-224) and GAFb (residues 256-433) domains (black arrows) are delimited according to their Pfam (PF01590) entry.

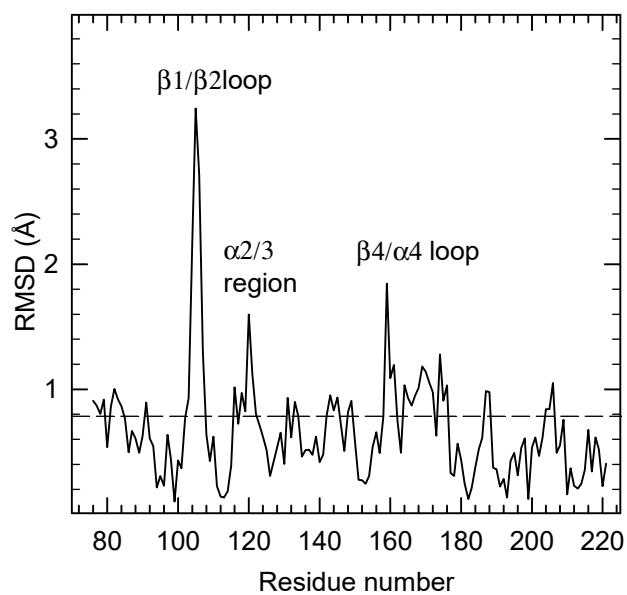

**Fig. S3. Comparison of the x-ray structures of the liganded and apo states of the PDE6C GAFa domain.** The GAFa domain x-ray structures for the unliganded (Fig. 2) and cGMP-liganded (3DBA; [1]) states were aligned, and the RMSD values for each residue were determined using VMD. The overall average RMSD = 0.8 Å is represented by the dashed line.

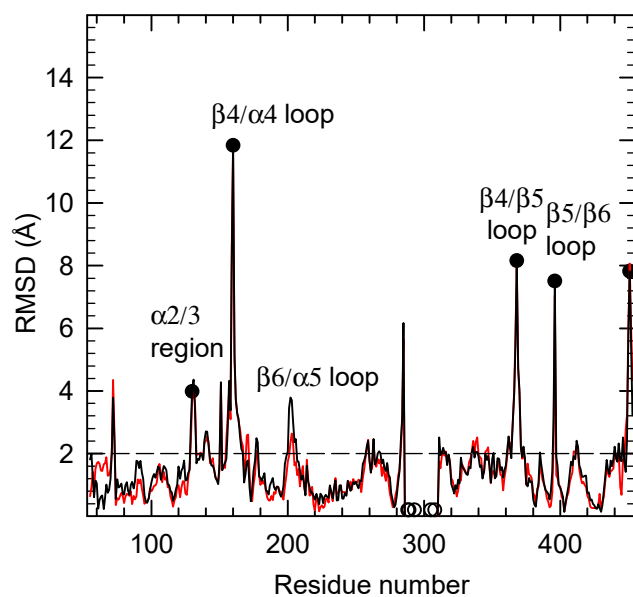

**Fig. S4. RMSD analysis of the chicken cone GAFab x-ray structure versus the cross link-refined apo GAFab structure.** RMSD per residue was calculated using VMD after aligning the GAFab X-ray structure with crosslink-refined apo structure. The black and red lines represent RMSD values for the A and B chains of GAFab, respectively. Black circles identify intra-molecular crosslinked residues of GAFab, and the open circles represent crosslinks obtained in the region missing in the x-ray structure (residues 285 to 311); only those cross-links that were at positions with RMSD values 2-fold or greater above the average are shown in this figure. The overall average RMSD = 2.0 Å is represented by the dashed line.

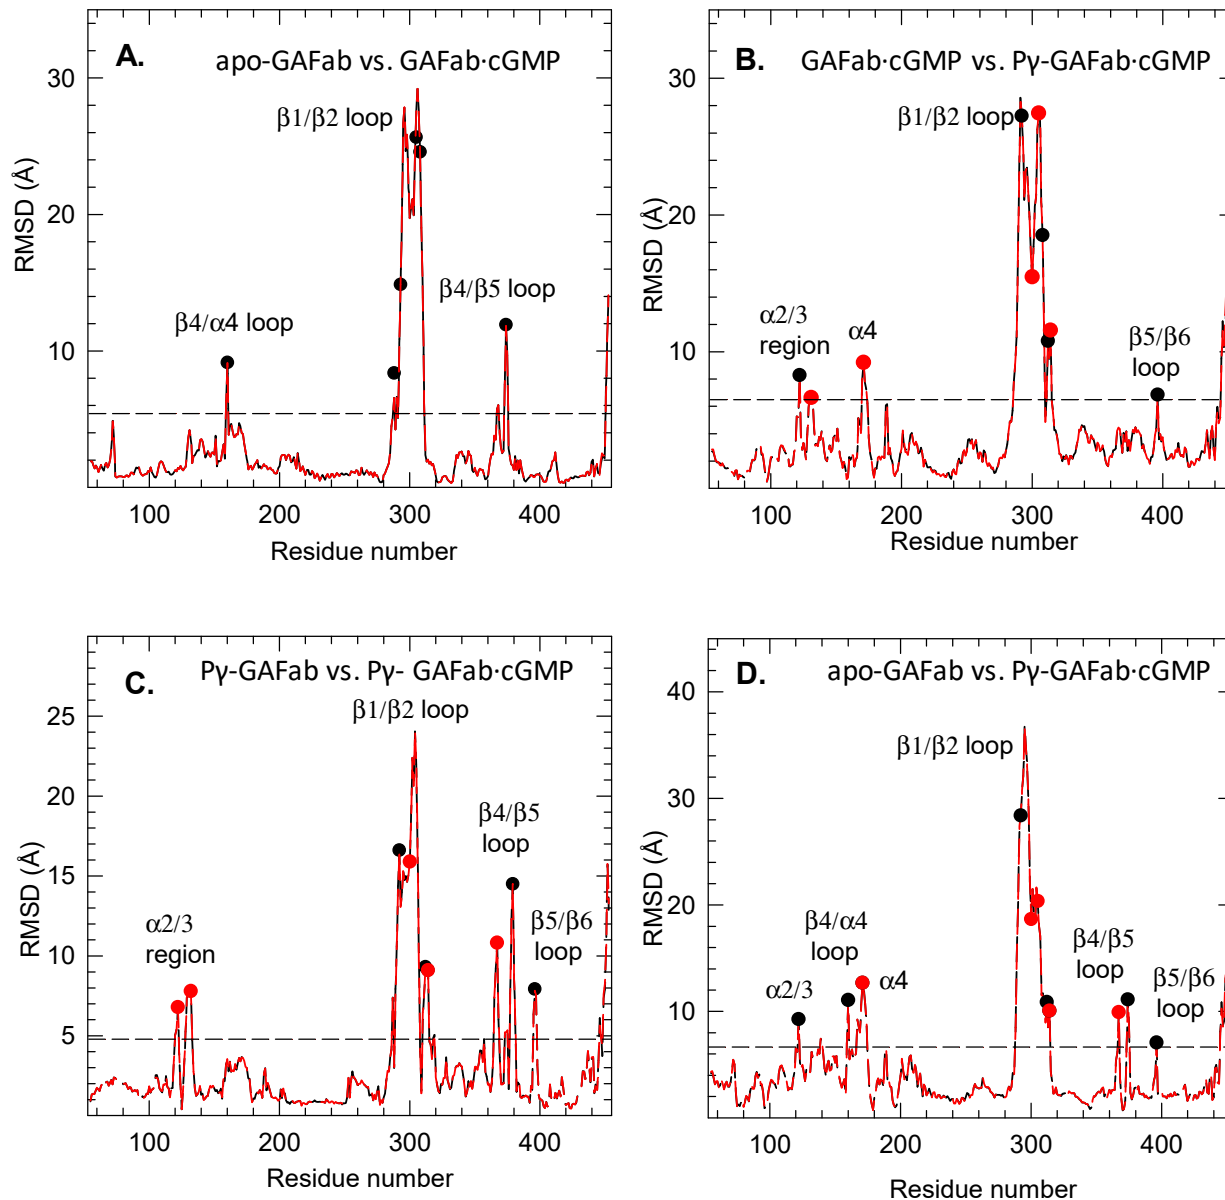

**Fig. S5. RMSD plots for various liganded states of GAFab.** RMSD per residue was calculated using VMD after aligning the apo GAFab structure with other liganded states: **A.** apo state versus GAFab·cGMP. **B.** GAFab·cGMP versus P $\gamma$ -GAFab·cGMP. **C.** P $\gamma$ -GAFab versus P $\gamma$ -GAFab·cGMP. **D.** apo state versus P $\gamma$ -GAFab·cGMP. The black and red lines represent RMSD values for the A and B chains of GAFab, respectively. Black and red circles represent intra-molecular GAFab and inter-molecular P $\gamma$ -GAFab crosslinked residues, respectively, for each liganded state; for clarity, only those cross-links whose RMSD exceeded the average value are shown. Dashed lines represent the average RMSD.

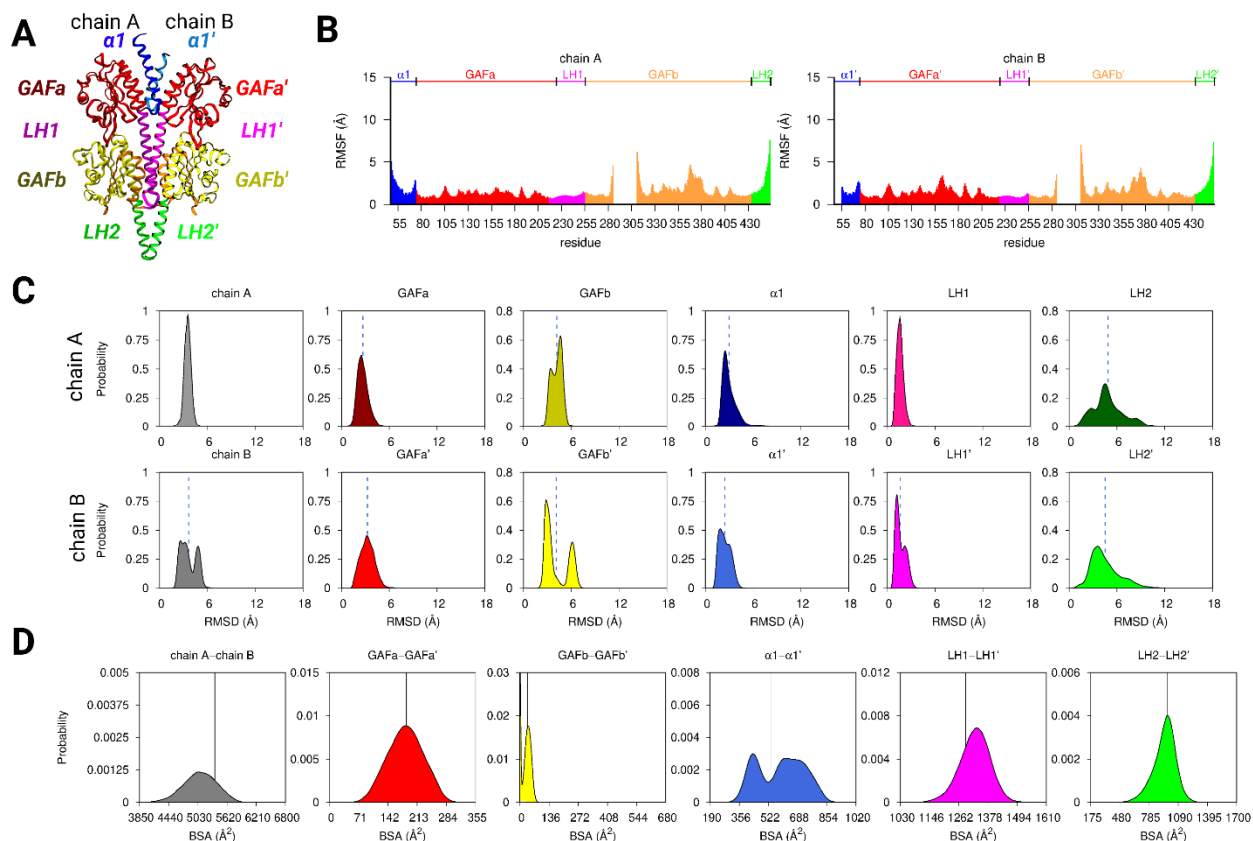

**Fig. S6. Dynamics and stability of the crystal structure of the GAFab homodimer as characterized by various conformational metrics.** **A.** Cartoon representation of the x-ray structure with color scheme for the subdomains characterized in panels B-D; note that chain B subdomains are denoted with an apostrophe for clarity. **B.** Root mean squared fluctuation (RMSF) per residue for each subunit, color-coded to correspond with the representation in panel A. **C.** Probability distributions of the root mean squared deviation (RMSD) for individual domains of each subunit. **D.** Distributions of the buried surface area (BSA) between various domains of the homodimer. Vertical lines marked on distributions correspond to mean values of the RMSD data from simulations (panel C) and the BSA values (panel D) observed in the crystal structure.

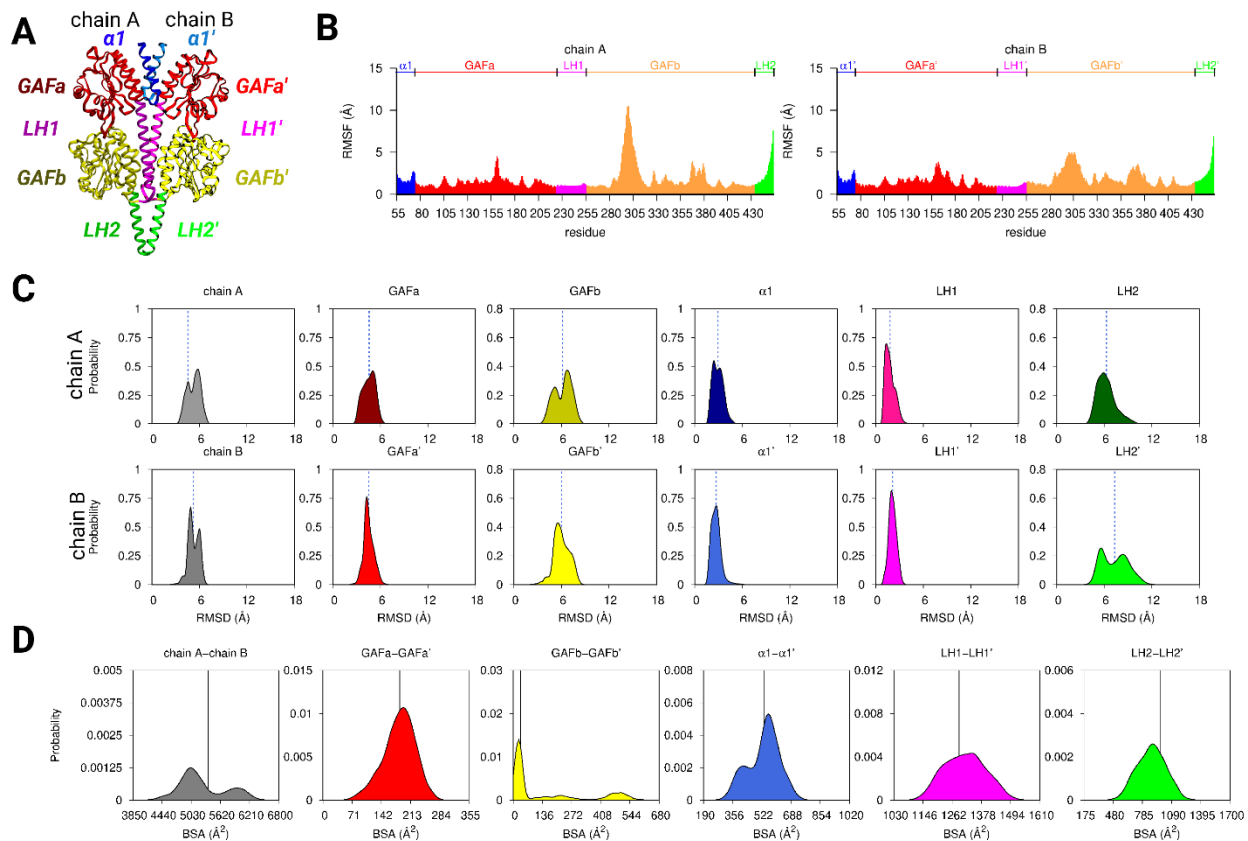

**Fig. S7. Conformational metrics highlighting dynamics of the apo state of the GAFab homodimer.** For the apo-state of GAFab (panel A), RMSF (panel B), RMSD probabilities (panel C) and BSA probabilities (panel D) are presented as described in the legend to Fig. S6.

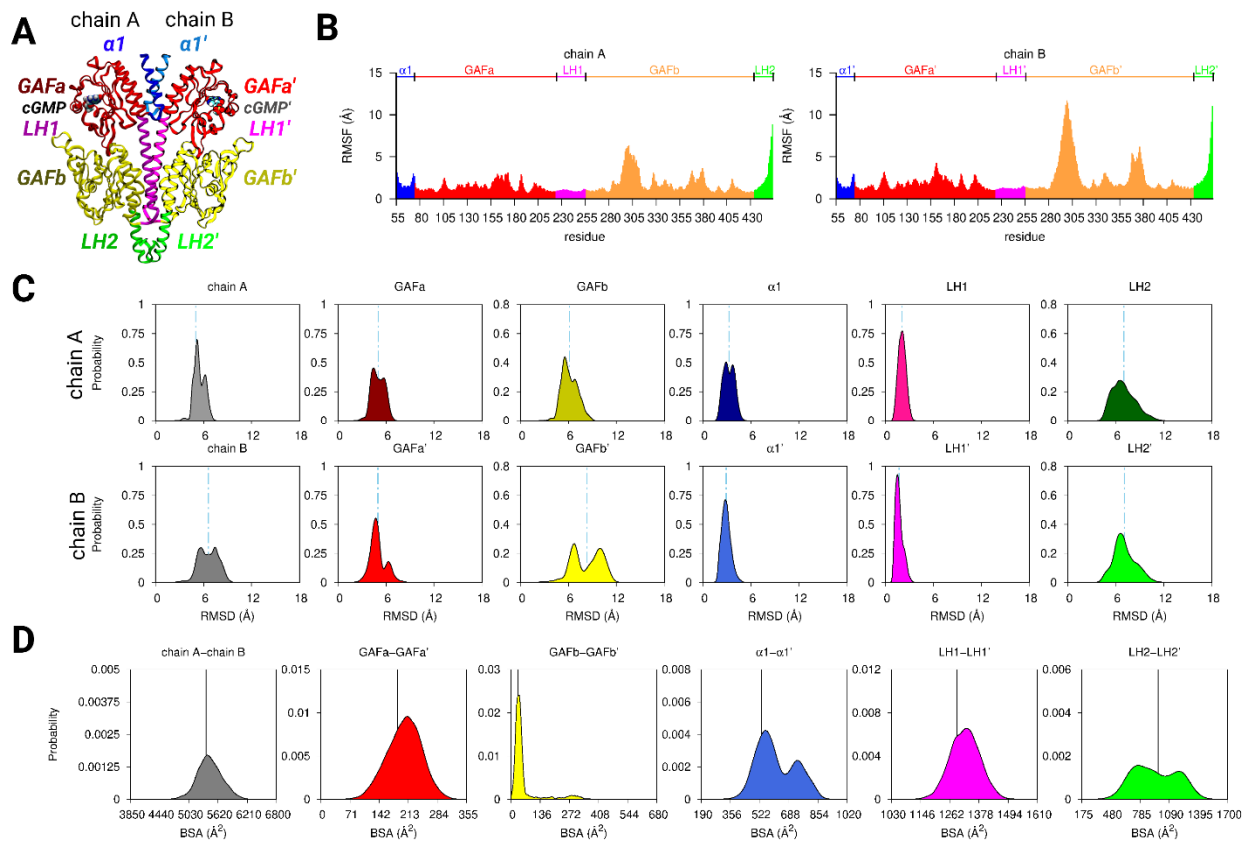

**Fig. S8. Conformational metrics highlighting the dynamics of the cGMP-bound state of the GAFab homodimer.** For the GAFab·cGMP state (panel A), RMSF (panel B), RMSD probabilities (panel C) and BSA probabilities (panel D) are presented as described in the legend to Fig. S6.

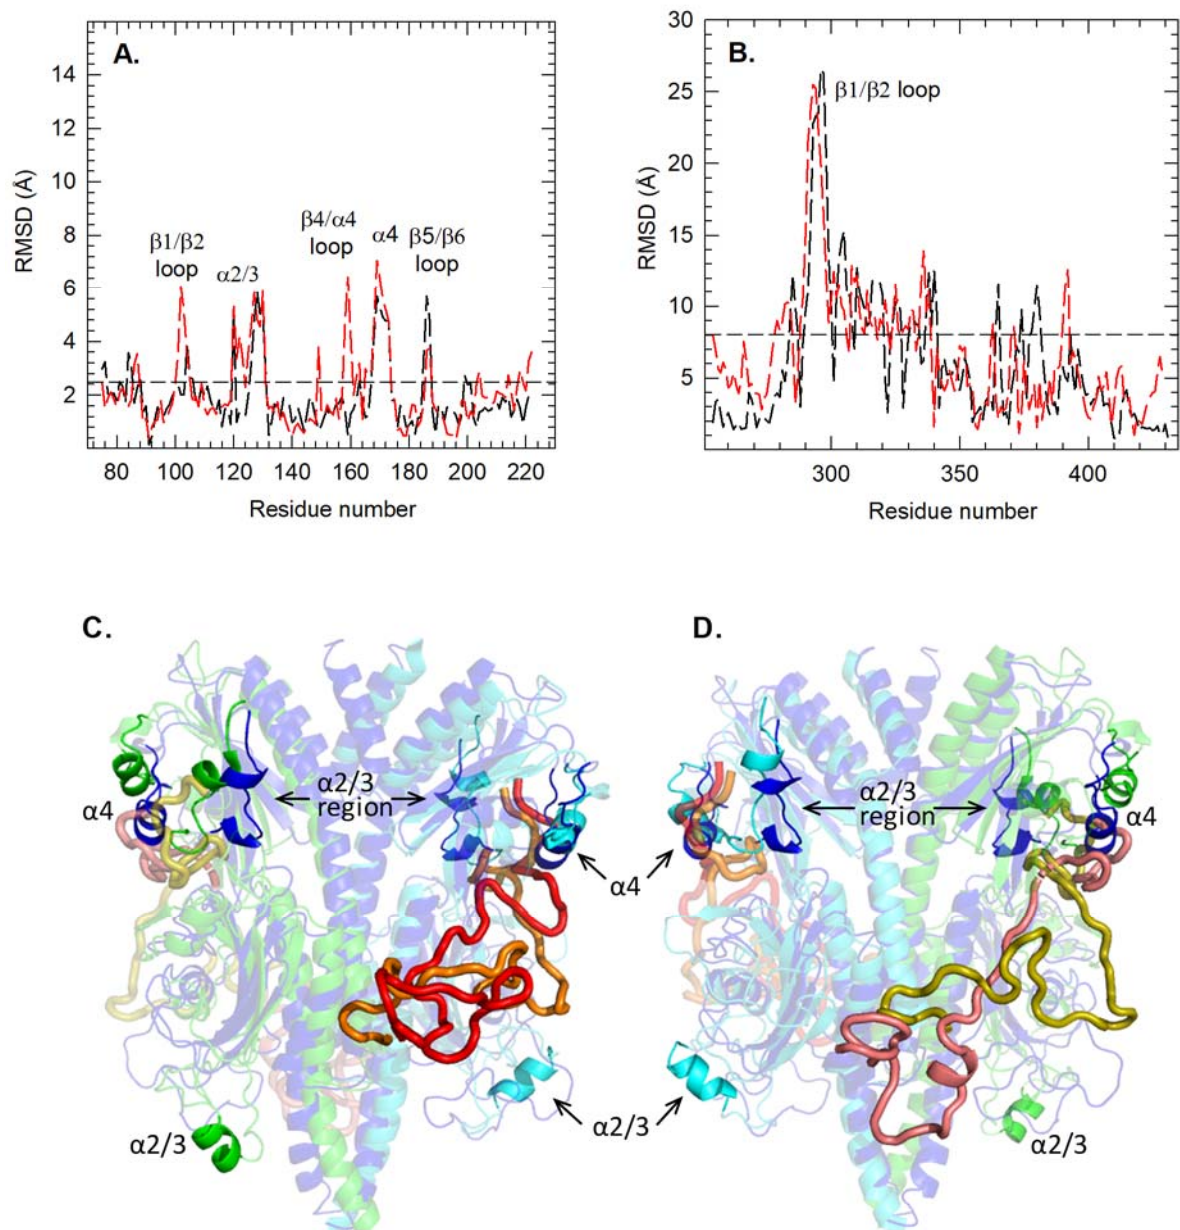

**Fig. S9. Structural comparison of chicken cone PDE6 GAFab with bovine rod PDE6 GAFab.** The GAFa domain (residues 77-224) and GAFb domain (residues 256-433) of chicken cone P $\gamma$ -GAFab·cGMP were structurally aligned with the corresponding residues of bovine rod PDE6 [containing P $\gamma$  and bound cGMP; [2]]. **A.** RMSD analysis for the GAFa domains of PDE6A (black line) and PDE6B (red line) compared to cone GAFab with an overall average RMSD = 2.8 Å (dashed line). **B.** RMSD analysis for the GAFb domain with the overall average RMSD = 7.8 Å (dashed line). **C.** Alignment of PDE6A (cyan; associated rod P $\gamma$  in red) with chain A of cone P $\gamma$ -GAFab·cGMP (blue; associated cone P $\gamma$  in orange). **D.** Alignment of PDE6B (green; rod P $\gamma$  in salmon) with chain B of cone P $\gamma$ -GAFab·cGMP (blue; cone P $\gamma$  colored olive). The GAFb  $\alpha$ 2/3 helix identified in rod PDE6 [2] is disordered in cone GAFab.



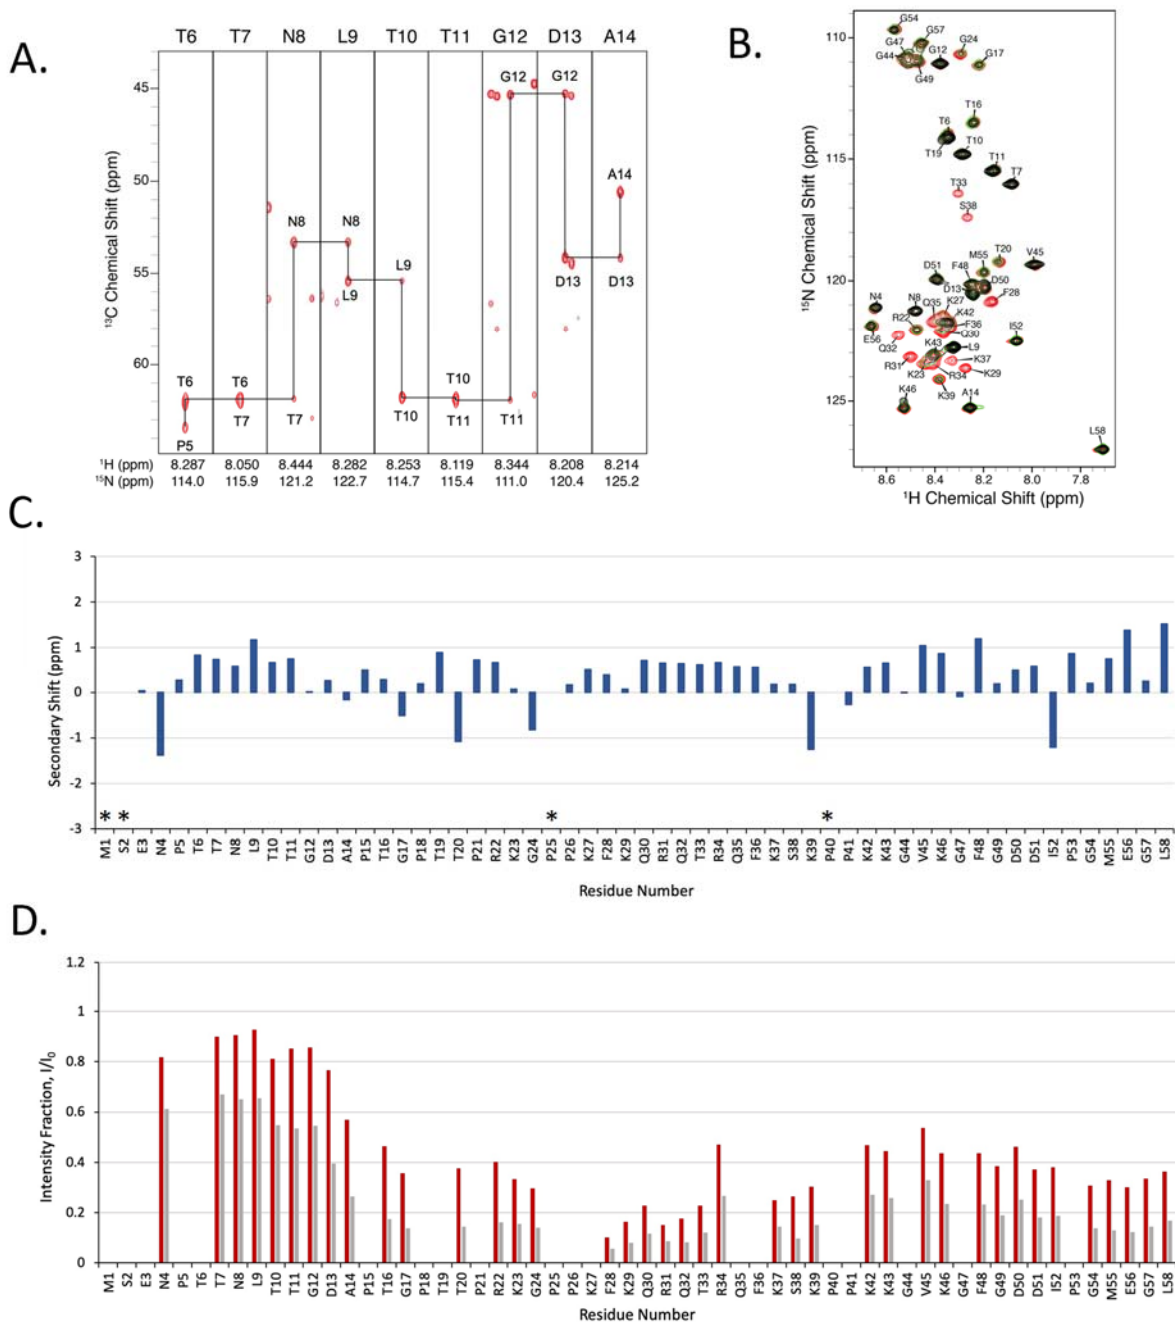

**Fig. S10. Solution NMR spectroscopy of cone P $\gamma$ 1-58.** **A.** Representative 3D HNCA NMR strip plot of P $\gamma$ 1-58 for residues T6-A14. The  $\text{C}\alpha$  peaks of the  $i$  and  $i-1$  residues are labeled and connected to guide the eye. **B.** Overlay of the 2D  $^1\text{H}$ - $^{15}\text{N}$  HSQC NMR spectra of unbound P $\gamma$  (red spectrum) and P $\gamma$  bound to GAFab without cGMP (green spectrum) and in the presence of cGMP (black spectrum). **C.** Secondary chemical shifts of P $\gamma$ 1-58, defined as the observed  $^{13}\text{C}$  chemical shifts relative to tabulated random coil shifts. Combined  $^{13}\text{C}\alpha$  and  $^{13}\text{C}\beta$  secondary chemical shifts ( $\Delta\delta^{13}\text{C}\alpha - \Delta\delta^{13}\text{C}\beta$ ) of P $\gamma$ 1-58 were plotted, and missing chemical shifts are noted with an asterisk. **D.** Peak intensities of P $\gamma$  residues expressed as the ratio between peak volume after ( $I$ ) and before ( $I_0$ ) addition of GAFab (red) or after subsequent addition of cGMP to the P $\gamma$ -GAFab complex (grey). Some peaks were not analyzed due to signal overlap or missing because they are prolines.

## References

- [1] Martinez SE, Heikaus CC, Klevit RE, Beavo JA. The structure of the GAF A domain from phosphodiesterase 6C reveals determinants of cGMP binding, a conserved binding surface, and a large cGMP-dependent conformational change. *J Biol Chem.* 2008;283:25913-9.
- [2] Irwin MJ, Gupta R, Gao XZ, Cahill KB, Chu F, Cote RH. The molecular architecture of photoreceptor phosphodiesterase 6 (PDE6) with activated G protein elucidates the mechanism of visual excitation. *J Biol Chem.* 2019;294:19486-97.
